# Supplementary material for: Proximal Active Optical Sensing Operational Improvement for Research Using the CropCircle ACS-470, Implications for Measurement of Normalized Difference Vegetation Index (NDVI)
Source: MDPI journal article supplement (doi:10.3390/s23115044), 2023-05-24
Supplement: s1 [file s1]

## Statistical analysis of data included in Figure 11

Analysis of individual sensor detector change in white panel reflectance by temperature change in °C measured before and after field collections for 62 events across four years that show a loose relation. Data includes all three detectors of all sensors from the "Wolverine" field collections taken 2018-2021. Results produced using JMP, build 15.2.0 SAS Institute Inc. Cary North Carolina 27513.

### Bivariate Fit of signal change (median\_diff) by temperature change (temp\_diff)

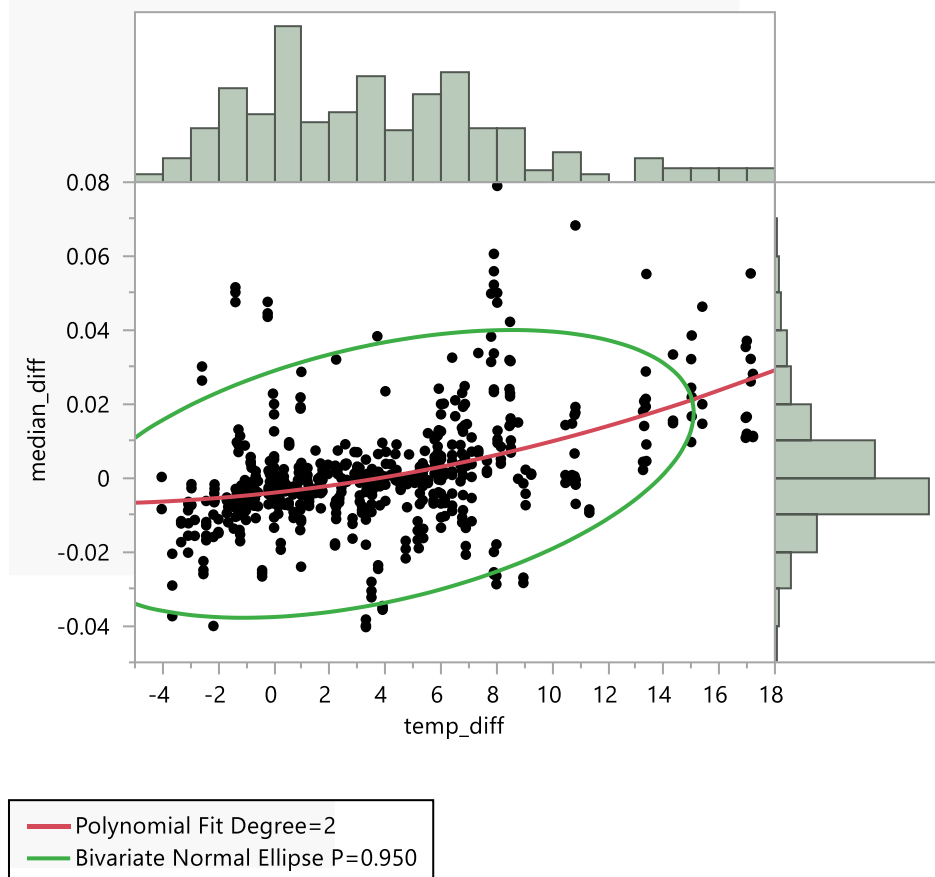

### Summary Statistics

|             | Value   | Lower 95% | Upper 95% | Signif. Prob |
|-------------|---------|-----------|-----------|--------------|
| Correlation | 0.42445 | 0.354497  | 0.489678  | <.0001*      |
| Covariance  | 0.03135 |           |           |              |
| Count       | 567     |           |           |              |

| Variable    | Mean     | Std Dev  |
|-------------|----------|----------|
| temp_diff   | 3.723794 | 4.640122 |
| median_diff | 0.001031 | 0.015918 |

## Polynomial Fit Degree=2

median\_diff = -0.004824 + 0.0012478\*temp\_diff + 5.6213e-5\*(temp\_diff-3.72379)^2

### Summary of Fit

|                            |          |
|----------------------------|----------|
| RSquare                    | 0.190149 |
| RSquare Adj                | 0.187278 |
| Root Mean Square Error     | 0.01435  |
| Mean of Response           | 0.001031 |
| Observations (or Sum Wgts) | 567      |

### Lack Of Fit

| Source      | DF  | Sum of Squares | Mean Square | F Ratio            |
|-------------|-----|----------------|-------------|--------------------|
| Lack Of Fit | 161 | 0.07756890     | 0.000482    | 5.0339             |
| Pure Error  | 403 | 0.03857121     | 0.000096    | <b>Prob &gt; F</b> |
| Total Error | 564 | 0.11614011     |             | <.0001*            |
|             |     |                |             | <b>Max RSq</b>     |
|             |     |                |             | 0.7310             |

### Analysis of Variance

| Source   | DF  | Sum of Squares | Mean Square | F Ratio            |
|----------|-----|----------------|-------------|--------------------|
| Model    | 2   | 0.02726918     | 0.013635    | 66.2123            |
| Error    | 564 | 0.11614011     | 0.000206    | <b>Prob &gt; F</b> |
| C. Total | 566 | 0.14340929     |             | <.0001*            |

### Parameter Estimates

| Term                  | Estimate  | Std Error | t Ratio | Prob> t |
|-----------------------|-----------|-----------|---------|---------|
| Intercept             | -0.004824 | 0.00079   | -6.10   | <.0001* |
| temp_diff             | 0.0012478 | 0.000152  | 8.20    | <.0001* |
| (temp_diff-3.72379)^2 | 5.6213e-5 | 2.131e-5  | 2.64    | 0.0086* |
