# Supplementary material for: Proximal Active Optical Sensing Operational Improvement for Research Using the CropCircle ACS-470, Implications for Measurement of Normalized Difference Vegetation Index (NDVI)
Source: MDPI journal article supplement (doi:10.3390/s23115044), 2023-05-24
Supplement: s1 [file s1]

## Statistical analysis of data included in Figure 10

Analysis of individual sensor detector change in white panel reflectance measured before and after 62 field collection events across four years that show individual detectors behave differently. Data includes all three detectors of all sensors from the "Wolverine" field collections taken 2018-2021. Results produced using JMP, build 15.2.0 SAS Institute Inc. Cary North Carolina 27513

### Oneway Analysis of signal change (median\_diff) by individual (detector)

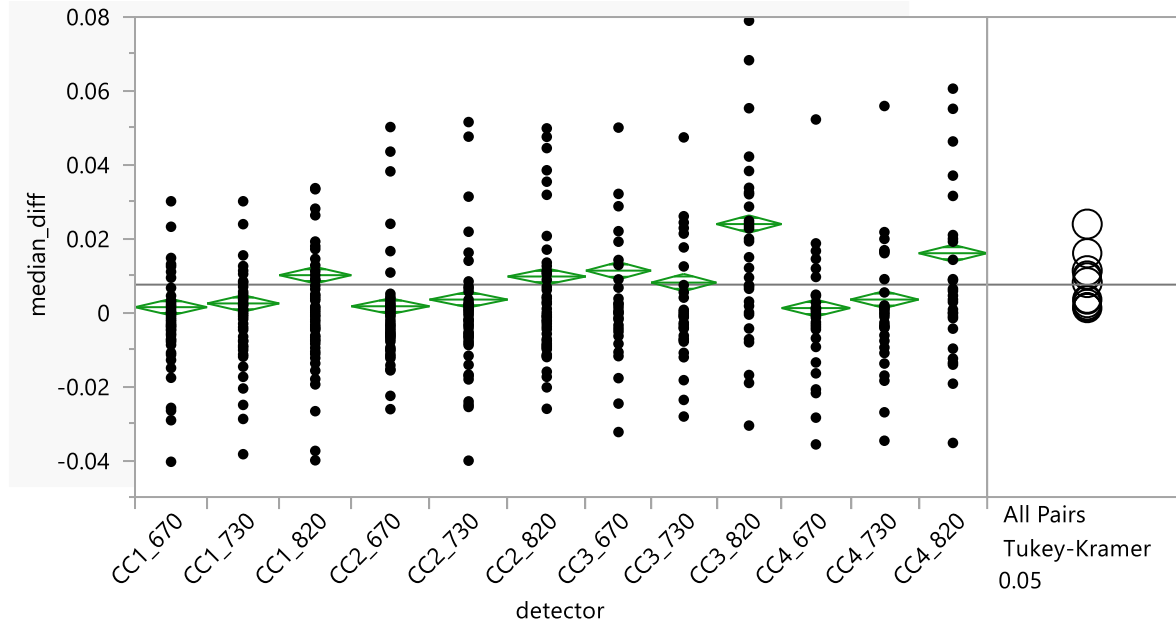

### Oneway Anova Summary of Fit

|                            |          |
|----------------------------|----------|
| Rsquare                    | 0.137102 |
| Adj Rsquare                | 0.133226 |
| Root Mean Square Error     | 0.016507 |
| Mean of Response           | 0.007527 |
| Observations (or Sum Wgts) | 2460.771 |

### Analysis of Variance

| Source   | DF   | Sum of Squares | Mean Square | F Ratio | Prob > F |
|----------|------|----------------|-------------|---------|----------|
| detector | 11   | 0.10601629     | 0.009638    | 35.3703 | <.0001*  |
| Error    | 2449 | 0.66725058     | 0.000272    |         |          |
| C. Total | 2460 | 0.77326687     |             |         |          |

## Means for Oneway Anova

| Level   | Number  | Mean     | Std Error | Lower 95% | Upper 95% |
|---------|---------|----------|-----------|-----------|-----------|
| CC1_670 | 208.197 | 0.001426 | 0.00114   | -0.0008   | 0.00367   |
| CC1_730 | 208.197 | 0.002437 | 0.00114   | 0.00019   | 0.00468   |
| CC1_820 | 208.197 | 0.010089 | 0.00114   | 0.0078    | 0.01233   |
| CC2_670 | 225.77  | 0.001671 | 0.00110   | -0.0005   | 0.00383   |
| CC2_730 | 225.77  | 0.003481 | 0.00110   | 0.0013    | 0.00564   |
| CC2_820 | 225.77  | 0.009731 | 0.00110   | 0.0076    | 0.01188   |
| CC3_670 | 188.45  | 0.011316 | 0.00120   | 0.0090    | 0.01367   |
| CC3_730 | 188.45  | 0.008075 | 0.00120   | 0.0057    | 0.01043   |
| CC3_820 | 188.45  | 0.023928 | 0.00120   | 0.0216    | 0.02629   |
| CC4_670 | 197.84  | 0.001179 | 0.00117   | -0.0011   | 0.00348   |
| CC4_730 | 197.84  | 0.003482 | 0.00117   | 0.0012    | 0.00578   |
| CC4_820 | 197.84  | 0.016033 | 0.00117   | 0.0137    | 0.01833   |

Std Error uses a pooled estimate of error variance

## Means Comparisons

Comparisons for all pairs using Tukey-Kramer HSD

## Confidence Quantile

| q*      | Alpha |
|---------|-------|
| 3.27120 | 0.05  |

## HSD Threshold Matrix

Abs(Dif)-HSD

|         | CC3_820  | CC4_820  | CC3_670  | CC1_820  | CC2_820  | CC3_730  | CC4_730  | CC2_730  | CC1_730  | CC2_670  | CC1_670  | CC4_670  |
|---------|----------|----------|----------|----------|----------|----------|----------|----------|----------|----------|----------|----------|
| CC3_820 | -0.00556 | 0.00240  | 0.00705  | 0.00841  | 0.00887  | 0.01029  | 0.01495  | 0.01512  | 0.01606  | 0.01693  | 0.01707  | 0.01725  |
| CC4_820 | 0.00240  | -0.00543 | -0.00078 | 0.00058  | 0.00104  | 0.00246  | 0.00712  | 0.00729  | 0.00823  | 0.00910  | 0.00925  | 0.00942  |
| CC3_670 | 0.00705  | -0.00078 | -0.00556 | -0.00420 | -0.00374 | -0.00232 | 0.00234  | 0.00251  | 0.00345  | 0.00432  | 0.00446  | 0.00464  |
| CC1_820 | 0.00841  | 0.00058  | -0.00420 | -0.00529 | -0.00483 | -0.00341 | 0.00125  | 0.00142  | 0.00236  | 0.00323  | 0.00337  | 0.00355  |
| CC2_820 | 0.00887  | 0.00104  | -0.00374 | -0.00483 | -0.00508 | -0.00367 | 0.00099  | 0.00117  | 0.00210  | 0.00298  | 0.00312  | 0.00329  |
| CC3_730 | 0.01029  | 0.00246  | -0.00232 | -0.00341 | -0.00367 | -0.00556 | -0.00090 | -0.00073 | 0.00021  | 0.00108  | 0.00122  | 0.00140  |
| CC4_730 | 0.01495  | 0.00712  | 0.00234  | 0.00125  | 0.00099  | -0.00090 | -0.00543 | -0.00526 | -0.00432 | -0.00345 | -0.00331 | -0.00313 |
| CC2_730 | 0.01512  | 0.00729  | 0.00251  | 0.00142  | 0.00117  | -0.00073 | -0.00526 | -0.00508 | -0.00414 | -0.00327 | -0.00313 | -0.00296 |
| CC1_730 | 0.01606  | 0.00823  | 0.00345  | 0.00236  | 0.00210  | 0.00021  | -0.00432 | -0.00414 | -0.00529 | -0.00442 | -0.00428 | -0.00410 |
| CC2_670 | 0.01693  | 0.00910  | 0.00432  | 0.00323  | 0.00298  | 0.00108  | -0.00345 | -0.00327 | -0.00442 | -0.00508 | -0.00494 | -0.00477 |
| CC1_670 | 0.01707  | 0.00925  | 0.00446  | 0.00337  | 0.00312  | 0.00122  | -0.00331 | -0.00313 | -0.00428 | -0.00494 | -0.00529 | -0.00511 |
| CC4_670 | 0.01725  | 0.00942  | 0.00464  | 0.00355  | 0.00329  | 0.00140  | -0.00313 | -0.00296 | -0.00410 | -0.00477 | -0.00511 | -0.00543 |

Positive values show pairs of means that are significantly different.

## Connecting Letters Report

| Level       | Mean       |
|-------------|------------|
| CC3_820 A   | 0.02392772 |
| CC4_820 B   | 0.01603268 |
| CC3_670 B C | 0.01131588 |
| CC1_820 C   | 0.01008920 |
| CC2_820 C   | 0.00973053 |
| CC3_730 C D | 0.00807457 |
| CC4_730 D E | 0.00348188 |

| Level   |     | Mean       |
|---------|-----|------------|
| CC2_730 | D E | 0.00348110 |
| CC1_730 | E   | 0.00243740 |
| CC2_670 | E   | 0.00167112 |
| CC1_670 | E   | 0.00142613 |
| CC4_670 | E   | 0.00117947 |

Levels not connected by same letter are significantly different.

## Ordered Differences Report

| Level   | - Level | Difference | Std Err Dif | Lower CL | Upper CL  | p-Value |  |
|---------|---------|------------|-------------|----------|-----------|---------|--|
| CC3_820 | CC4_670 | 0.0227482  | 0.0016802   | 0.017252 | 0.0282446 | <.0001* |  |
| CC3_820 | CC1_670 | 0.0225016  | 0.0016597   | 0.017072 | 0.0279309 | <.0001* |  |
| CC3_820 | CC2_670 | 0.0222566  | 0.0016288   | 0.016929 | 0.0275846 | <.0001* |  |
| CC3_820 | CC1_730 | 0.0214903  | 0.0016597   | 0.016061 | 0.0269196 | <.0001* |  |
| CC3_820 | CC2_730 | 0.0204466  | 0.0016288   | 0.015119 | 0.0257746 | <.0001* |  |
| CC3_820 | CC4_730 | 0.0204458  | 0.0016802   | 0.014949 | 0.0259422 | <.0001* |  |
| CC3_820 | CC3_730 | 0.0158531  | 0.0017005   | 0.010290 | 0.0214160 | <.0001* |  |
| CC4_820 | CC4_670 | 0.0148532  | 0.0016597   | 0.009424 | 0.0202824 | <.0001* |  |
| CC4_820 | CC1_670 | 0.0146065  | 0.0016389   | 0.009245 | 0.0199678 | <.0001* |  |
| CC4_820 | CC2_670 | 0.0143616  | 0.0016075   | 0.009103 | 0.0196202 | <.0001* |  |
| CC3_820 | CC2_820 | 0.0141972  | 0.0016288   | 0.008869 | 0.0195251 | <.0001* |  |
| CC3_820 | CC1_820 | 0.0138385  | 0.0016597   | 0.008409 | 0.0192678 | <.0001* |  |
| CC4_820 | CC1_730 | 0.0135953  | 0.0016389   | 0.008234 | 0.0189565 | <.0001* |  |
| CC3_820 | CC3_670 | 0.0126118  | 0.0017005   | 0.007049 | 0.0181746 | <.0001* |  |
| CC4_820 | CC2_730 | 0.0125516  | 0.0016075   | 0.007293 | 0.0178102 | <.0001* |  |
| CC4_820 | CC4_730 | 0.0125508  | 0.0016597   | 0.007122 | 0.0179800 | <.0001* |  |
| CC3_670 | CC4_670 | 0.0101364  | 0.0016802   | 0.004640 | 0.0156328 | <.0001* |  |
| CC3_670 | CC1_670 | 0.0098898  | 0.0016597   | 0.004460 | 0.0153191 | <.0001* |  |
| CC3_670 | CC2_670 | 0.0096448  | 0.0016288   | 0.004317 | 0.0149727 | <.0001* |  |
| CC1_820 | CC4_670 | 0.0089097  | 0.0016389   | 0.003548 | 0.0142710 | <.0001* |  |
| CC3_670 | CC1_730 | 0.0088785  | 0.0016597   | 0.003449 | 0.0143078 | <.0001* |  |
| CC1_820 | CC1_670 | 0.0086631  | 0.0016179   | 0.003371 | 0.0139555 | <.0001* |  |
| CC2_820 | CC4_670 | 0.0085511  | 0.0016075   | 0.003292 | 0.0138097 | <.0001* |  |
| CC1_820 | CC2_670 | 0.0084181  | 0.0015861   | 0.003230 | 0.0136065 | <.0001* |  |
| CC2_820 | CC1_670 | 0.0083044  | 0.0015861   | 0.003116 | 0.0134928 | <.0001* |  |
| CC2_820 | CC2_670 | 0.0080594  | 0.0015536   | 0.002977 | 0.0131417 | <.0001* |  |
| CC4_820 | CC3_730 | 0.0079581  | 0.0016802   | 0.002462 | 0.0134545 | 0.0001* |  |
| CC3_820 | CC4_820 | 0.0078950  | 0.0016802   | 0.002399 | 0.0133914 | 0.0002* |  |
| CC3_670 | CC2_730 | 0.0078348  | 0.0016288   | 0.002507 | 0.0131628 | 0.0001* |  |
| CC3_670 | CC4_730 | 0.0078340  | 0.0016802   | 0.002338 | 0.0133304 | 0.0002* |  |
| CC1_820 | CC1_730 | 0.0076518  | 0.0016179   | 0.002359 | 0.0129442 | 0.0002* |  |
| CC2_820 | CC1_730 | 0.0072931  | 0.0015861   | 0.002105 | 0.0124816 | 0.0003* |  |
| CC3_730 | CC4_670 | 0.0068951  | 0.0016802   | 0.001399 | 0.0123915 | 0.0025* |  |
| CC3_730 | CC1_670 | 0.0066484  | 0.0016597   | 0.001219 | 0.0120777 | 0.0037* |  |
| CC1_820 | CC2_730 | 0.0066081  | 0.0015861   | 0.001420 | 0.0117965 | 0.0019* |  |
| CC1_820 | CC4_730 | 0.0066073  | 0.0016389   | 0.001246 | 0.0119686 | 0.0033* |  |
| CC3_730 | CC2_670 | 0.0064034  | 0.0016288   | 0.001075 | 0.0117314 | 0.0049* |  |
| CC4_820 | CC2_820 | 0.0063021  | 0.0016075   | 0.001044 | 0.0115607 | 0.0052* |  |
| CC2_820 | CC2_730 | 0.0062494  | 0.0015536   | 0.001167 | 0.0113317 | 0.0034* |  |
| CC2_820 | CC4_730 | 0.0062487  | 0.0016075   | 0.000990 | 0.0115073 | 0.0059* |  |

| Level   | - Level | Difference | Std Err Dif | Lower CL  | Upper CL  | p-Value |  |
|---------|---------|------------|-------------|-----------|-----------|---------|--|
| CC4_820 | CC1_820 | 0.0059435  | 0.0016389   | 0.000582  | 0.0113047 | 0.0154* |  |
| CC3_730 | CC1_730 | 0.0056372  | 0.0016597   | 0.000208  | 0.0110665 | 0.0337* |  |
| CC4_820 | CC3_670 | 0.0047168  | 0.0016802   | -0.000780 | 0.0102132 | 0.1774  |  |
| CC3_730 | CC2_730 | 0.0045935  | 0.0016288   | -0.000734 | 0.0099214 | 0.1720  |  |
| CC3_730 | CC4_730 | 0.0045927  | 0.0016802   | -0.000904 | 0.0100891 | 0.2104  |  |
| CC3_670 | CC3_730 | 0.0032413  | 0.0017005   | -0.002321 | 0.0088041 | 0.7556  |  |
| CC4_730 | CC4_670 | 0.0023024  | 0.0016597   | -0.003127 | 0.0077316 | 0.9661  |  |
| CC2_730 | CC4_670 | 0.0023016  | 0.0016075   | -0.002957 | 0.0075602 | 0.9573  |  |
| CC4_730 | CC1_670 | 0.0020557  | 0.0016389   | -0.003305 | 0.0074170 | 0.9843  |  |
| CC2_730 | CC1_670 | 0.0020550  | 0.0015861   | -0.003133 | 0.0072434 | 0.9798  |  |
| CC1_820 | CC3_730 | 0.0020146  | 0.0016597   | -0.003415 | 0.0074439 | 0.9880  |  |
| CC4_730 | CC2_670 | 0.0018108  | 0.0016075   | -0.003448 | 0.0070694 | 0.9935  |  |
| CC2_730 | CC2_670 | 0.0018100  | 0.0015536   | -0.003272 | 0.0068923 | 0.9914  |  |
| CC2_820 | CC3_730 | 0.0016560  | 0.0016288   | -0.003672 | 0.0069839 | 0.9974  |  |
| CC3_670 | CC2_820 | 0.0015853  | 0.0016288   | -0.003743 | 0.0069133 | 0.9982  |  |
| CC1_730 | CC4_670 | 0.0012579  | 0.0016389   | -0.004103 | 0.0066192 | 0.9998  |  |
| CC3_670 | CC1_820 | 0.0012267  | 0.0016597   | -0.004203 | 0.0066560 | 0.9999  |  |
| CC4_730 | CC1_730 | 0.0010445  | 0.0016389   | -0.004317 | 0.0064057 | 1.0000  |  |
| CC2_730 | CC1_730 | 0.0010437  | 0.0015861   | -0.004145 | 0.0062321 | 1.0000  |  |
| CC1_730 | CC1_670 | 0.0010113  | 0.0016179   | -0.004281 | 0.0063037 | 1.0000  |  |
| CC1_730 | CC2_670 | 0.0007663  | 0.0015861   | -0.004422 | 0.0059547 | 1.0000  |  |
| CC2_670 | CC4_670 | 0.0004916  | 0.0016075   | -0.004767 | 0.0057502 | 1.0000  |  |
| CC1_820 | CC2_820 | 0.0003587  | 0.0015861   | -0.004830 | 0.0055471 | 1.0000  |  |
| CC1_670 | CC4_670 | 0.0002467  | 0.0016389   | -0.005115 | 0.0056079 | 1.0000  |  |
| CC2_670 | CC1_670 | 0.0002450  | 0.0015861   | -0.004943 | 0.0054334 | 1.0000  |  |
| CC4_730 | CC2_730 | 7.8096e-7  | 0.0016075   | -0.005258 | 0.0052594 | 1.0000  |  |

Freq                      temp\_diff  
No Weight Rows 141
